# Supplementary material for: Binding TiO2-B nanosheets with N-doped carbon enables highly durable anodes for lithium-ion batteries
Source: Royal Society of Chemistry journal article supplement (doi:10.1039/c6ta01955b), 2016-01-01
Supplement: c6ta01955b1.pdf [file c6ta01955b1.pdf]

## *Electronic Supplementary Information*

### **Binding TiO<sub>2</sub>-B nanosheets with N-doped carbon enables highly durable anodes for lithium-ion batteries**

**Chaoji Chen,<sup>a</sup> Bao Zhang,<sup>b</sup> Ling Miao,<sup>b</sup> Mengyu Yan,<sup>c</sup> Liqiang Mai,<sup>c</sup> Yunhui**

**Huang<sup>\*a</sup> and Xianluo Hu<sup>\*a</sup>**

<sup>a</sup> State Key Laboratory of Materials Processing and Die & Mould Technology, School of Materials Science and Engineering, Huazhong University of Science and Technology, Wuhan 430074, China

<sup>b</sup> Wuhan National Laboratory for Optoelectronics, and School of Optical and Electronic Information, Huazhong University of Science and Technology, Wuhan 430074, China

<sup>c</sup> State Key Laboratory of Advanced Technology for Materials Synthesis and Processing, Wuhan University of Technology, Wuhan 430070, China

\*Correspondence to: [huxl@mail.hust.edu.cn](mailto:huxl@mail.hust.edu.cn); [huangyh@hust.edu.cn](mailto:huangyh@hust.edu.cn)

#### **Supplementary Method S1: calculation details for the separation of the diffusion- and capacitive-controlled charge**

Generally, the total current (or charge) of the electrode at a certain potential comprises two components, described by the equation of  $i(V) = k_1v^{1/2} + k_2v$  and  $i(V)/v^{1/2} = k_1 + k_2v^{1/2}$  (Eq. 1), based on the power law relationship of  $i = av^{1/2}$  for the diffusion-controlled processes and  $i = av$  for the capacitive-controlled processes. From the cyclic voltammograms at various scan rates of 0.1–2 mV s<sup>-1</sup>, the current values can be determined when the voltage is given. According to Eq. 1, the values of  $k_1$  (intercept) and  $k_2$  (slope) at a fixed potential can be determined by plotting curves of  $i(V)/v^{1/2}$  vs.  $v^{1/2}$  ( $v$  varies from 0.1 to 2 mV s<sup>-1</sup>). When  $k_1$  and  $k_2$  values at each voltage are quantified, the values of  $k_1v^{1/2}$  and  $k_2v$  at a certain scan rate ( $v$ ) can be determined, thus the diffusion-controlled current ( $k_1v^{1/2}$ ) and capacitive-controlled current ( $k_2v$ ) be separated.

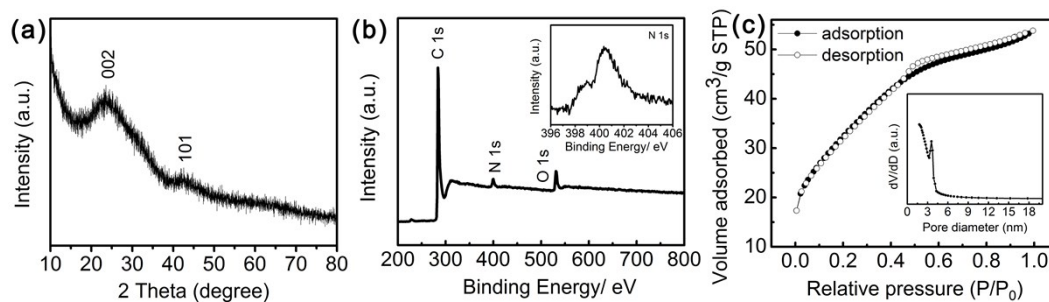

**Fig. S1** Structure characterizations of NPC: (a) XRD pattern, (b) survey XPS spectrum, inset is the high-resolution XPS N 1s spectrum and (c) nitrogen adsorption/desorption isotherms, inset is the pore-size distribution. All peaks in the XRD pattern can be indexed to hard carbon. The survey XPS spectrum shows three peaks of C 1s, N 1s and O1s, indicating the existence of doping N in the NPC material, which can be further confirmed by the high-resolution XPS N 1s spectrum. The NPC demonstrates a meso- and microporous structure with a large BET surface area of  $2611 \text{ m}^2 \text{ g}^{-1}$ .

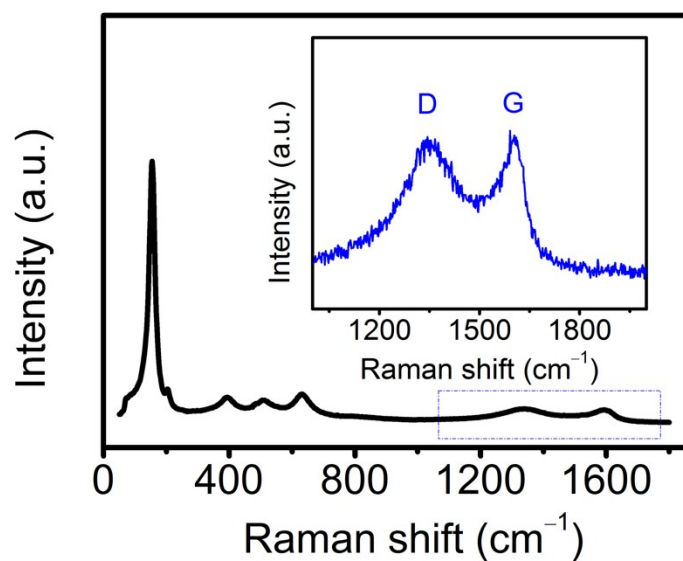

**Fig. S2** Raman spectrum for the NPC-TiO<sub>2</sub>-B hybrid.

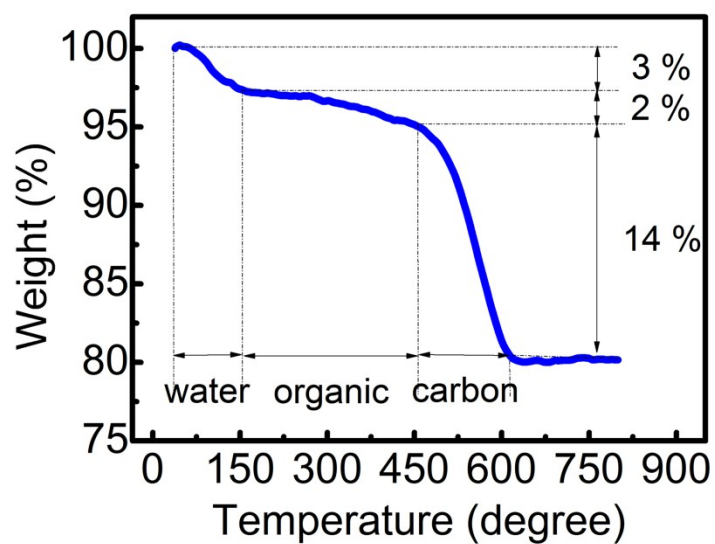

**Fig. S3** TG curve for the precursor of the NPC-TiO<sub>2</sub>-B hybrid. Accordingly the carbon content in the NPC- TiO<sub>2</sub>-B hybrid is about 14 wt.%.

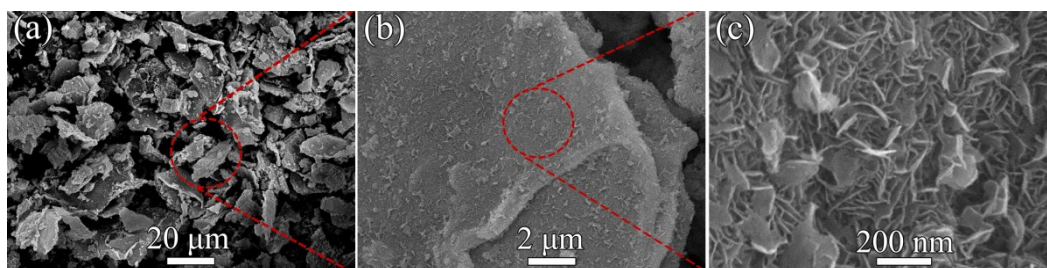

**Fig. S4** (a-c) SEM images of the NPC-TiO<sub>2</sub>-B hybrid. Numerous nanosheets grow inside and outside the carbon skeleton, forming a bulky hybrid architecture of dozens of micrometers in width and length.

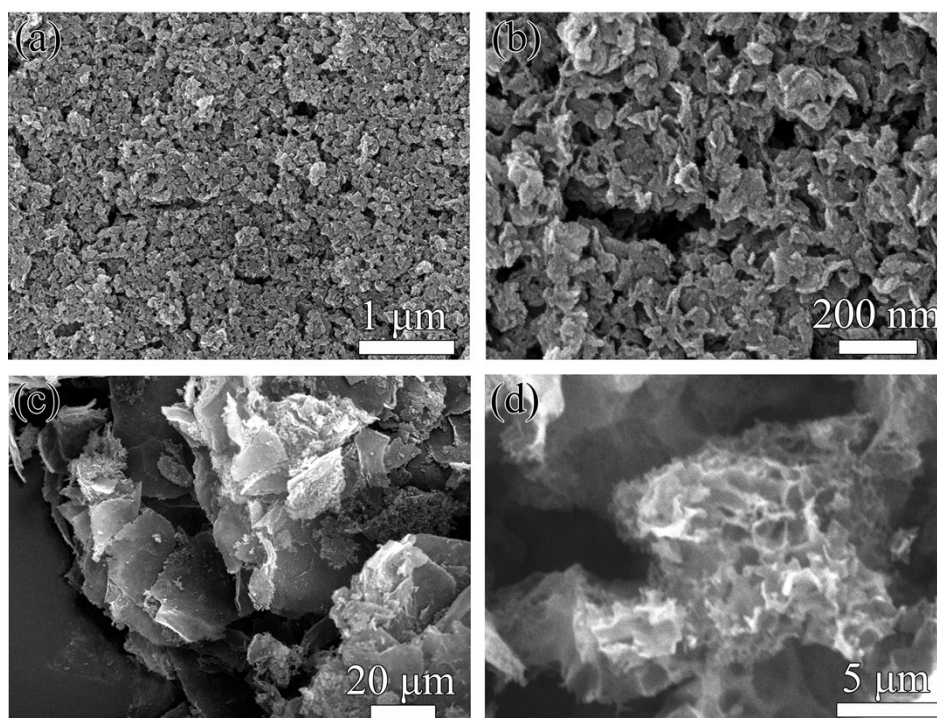

**Fig. S5** SEM images of TNS (a,b) and NPC (c,d).

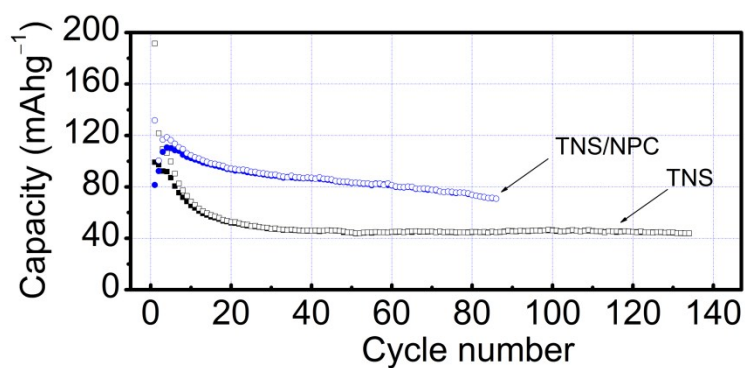

**Fig. S6** Electrochemical lithium-storage performance of the TNS and TNS/NPC electrodes: discharging-charging at a current density of 500 mA g<sup>-1</sup>.

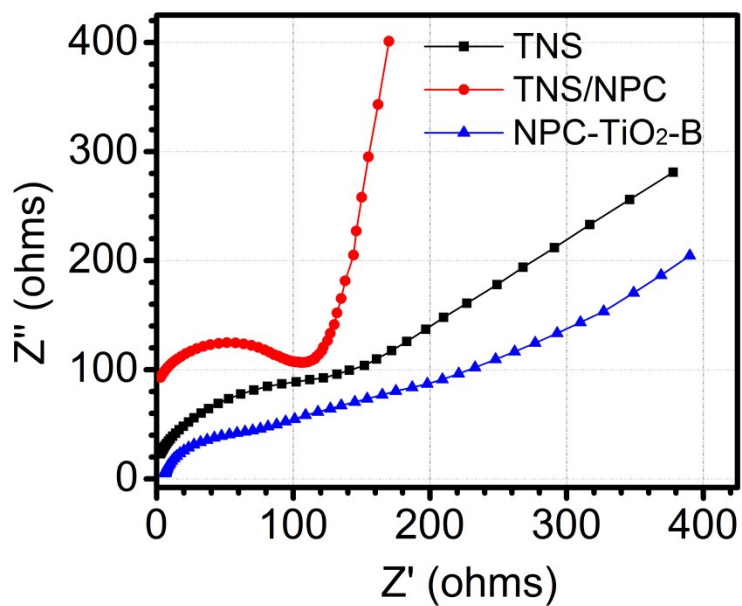

**Fig. S7** EIS spectra for the three electrodes after 1 discharge-charge cycle.

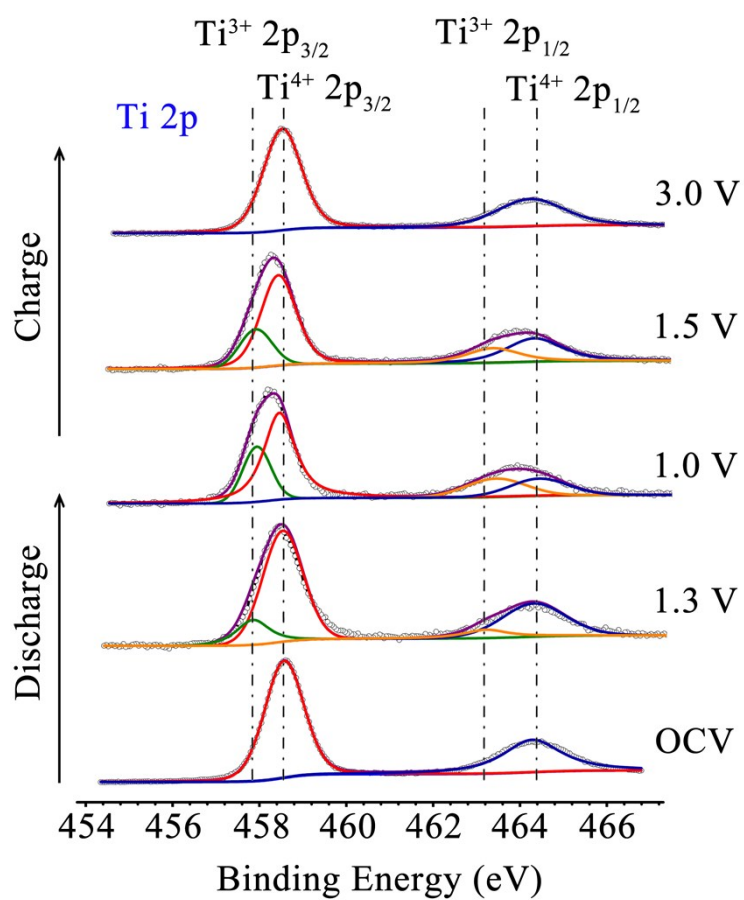

**Fig. S8** Ex-situ high-resolution XPS spectra of Ti 2p for the NPC-TiO<sub>2</sub>-B electrodes at various states of discharge then charge.
